# Supplementary material for: Performance evaluation of the Alphasense OPC-N3 and Plantower PMS5003 sensor in measuring dust events in the Salt Lake Valley, Utah
Source: Copernicus journal article supplement (doi:10.5194/amt-16-2455-2023), 2023-05-24
Supplement: Supplementary file 1 [file amt-16-2455-2023-supplement.pdf]

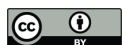

*Supplement of*

## **Performance evaluation of the Alphasense OPC-N3 and Plantower PMS5003 sensor in measuring dust events in the Salt Lake Valley, Utah**

**Kamaljeet Kaur and Kerry E. Kelly**

*Correspondence to:* Kerry E. Kelly ([kerry.kelly@utah.edu](mailto:kerry.kelly@utah.edu))

The copyright of individual parts of the supplement might differ from the article licence.

## Section S1: Multilinear regression

Crilley et al. (2018) identified non-linear behaviour of the OPC-N2 when relative humidity was greater than 85%, indicating that for relative humidity less than 85%, a linear response could be observed between the OPC response and relative humidity. Therefore, we performed a multi-linear regression, for measurement with relative humidity < 85%, with FEM-HW PM<sub>10</sub> as the dependent variable and OPC-HW, and relative humidity (RH) as independent variables.

### Without considering the effect of the RH:

|                            | Intercept<br>Coefficient<br>( $\mu\text{g}/\text{m}^3$ ) | Intercept<br>Standard<br>Error<br>( $\mu\text{g}/\text{m}^3$ ) | PM <sub>10</sub> OPC-<br>HW<br>MLR<br>Coefficient | PM <sub>10</sub> OPC-<br>HW<br>Standard<br>Error | R <sup>2</sup> | Adjusted<br>R <sup>2</sup> | RMSE<br>( $\mu\text{g}/\text{m}^3$ ) |
|----------------------------|----------------------------------------------------------|----------------------------------------------------------------|---------------------------------------------------|--------------------------------------------------|----------------|----------------------------|--------------------------------------|
| PM <sub>10</sub><br>FEM-HW | 3.74                                                     | 0.581                                                          | 0.939                                             | 0.0148                                           | 0.865          | 0.865                      | 12.0                                 |

### Considering the RH:

|                                | Intercept<br>Coefficient<br>t<br>( $\mu\text{g}/\text{m}^3$ ) | Intercept<br>Standard<br>Error<br>( $\mu\text{g}/\text{m}^3$ ) | RH %<br>MLR<br>Coefficient<br>t | RH %<br>Standard<br>Error | PM <sub>10</sub><br>OPC-HW<br>MLR<br>Coefficient<br>t | PM <sub>10</sub><br>OPC-<br>HW<br>Standard<br>Error | R <sup>2</sup> | Adjusted<br>R <sup>2</sup> | RMSE<br>( $\mu\text{g}/\text{m}^3$ ) |
|--------------------------------|---------------------------------------------------------------|----------------------------------------------------------------|---------------------------------|---------------------------|-------------------------------------------------------|-----------------------------------------------------|----------------|----------------------------|--------------------------------------|
| PM <sub>10</sub><br>FEM-<br>HW | 9.65                                                          | 1.11                                                           | -0.153                          | 0.0247                    | 0.928                                                 | 0.0145                                              | 0.872          | 0.872                      | 11.7                                 |

The inclusion of RH did not increase the correlation significantly. Therefore, the low-cost sensors measurements were not corrected for the relative humidity.

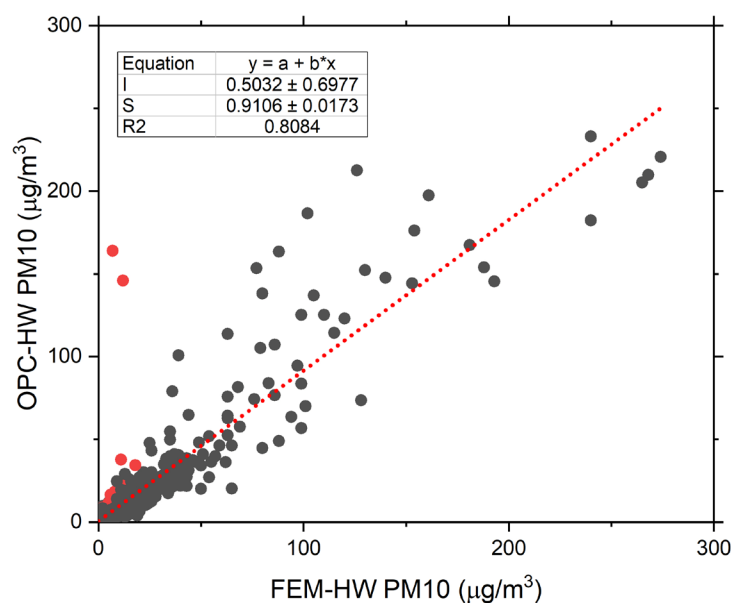

**Fig S1:** Correlation between OPC-N3 and FEM at HW for PM<sub>10</sub>. The plot includes all the measurements including measurements with corresponding high relative humidity (>85%). The high humidity points (>85%) are marked as red. I and S in the box represent intercept and slope. Each measurement represents hourly averaged PM<sub>10</sub> concentrations.

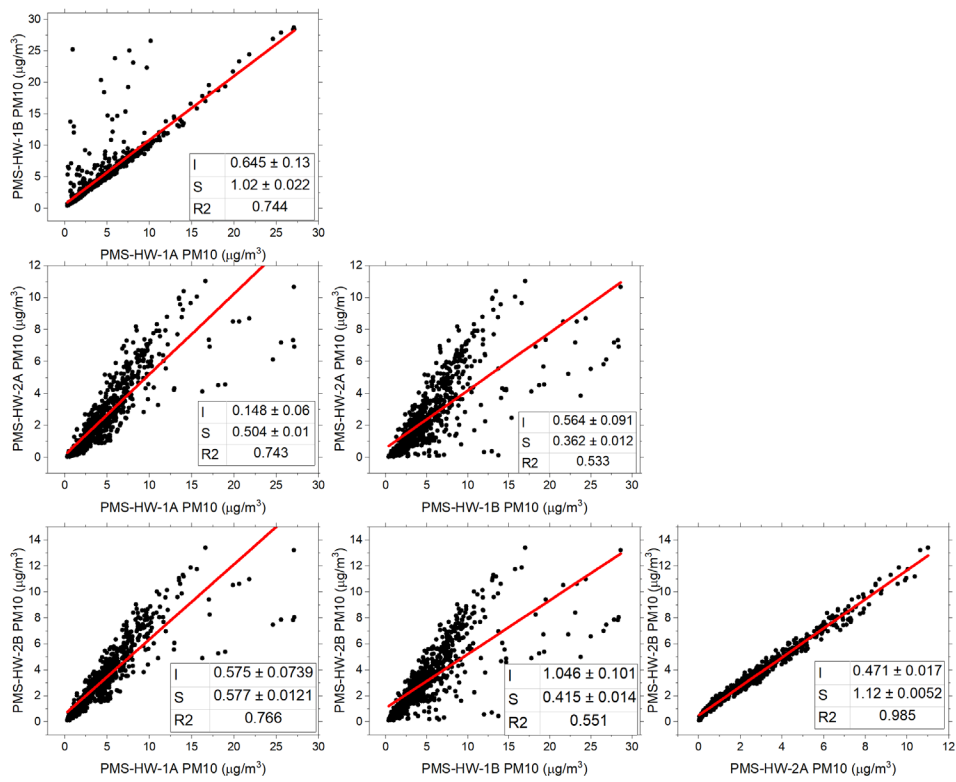

**Figure S2:** Inter-sensor correlation of PMS5003 sensors at HW site for PM<sub>10</sub> concentrations. The plot includes measurements recorded between 04/1/2022 – 04/30/2022. I: intercept; S: slope. Each measurement represents hourly averaged PM<sub>10</sub> concentrations.

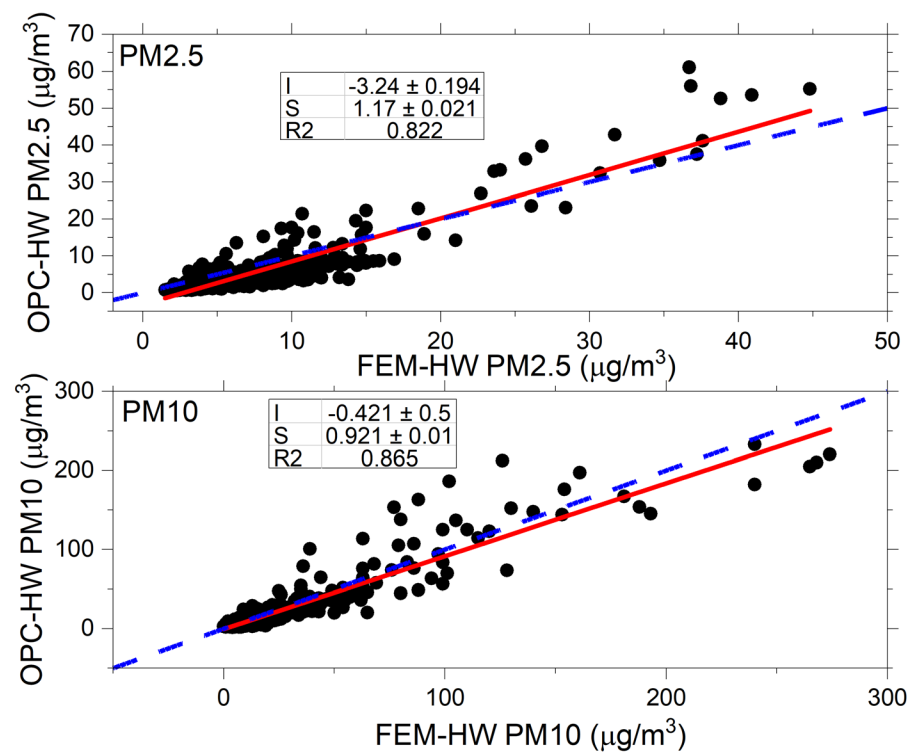

**Figure S3:** Hourly-averaged PM<sub>2.5</sub> and hourly averaged PM<sub>10</sub> concentrations for OPC-HW and FEM-HW at HW site. The plot includes measurements recorded between 04/1/2022 – 04/30/2022. I: intercept; S: slope.

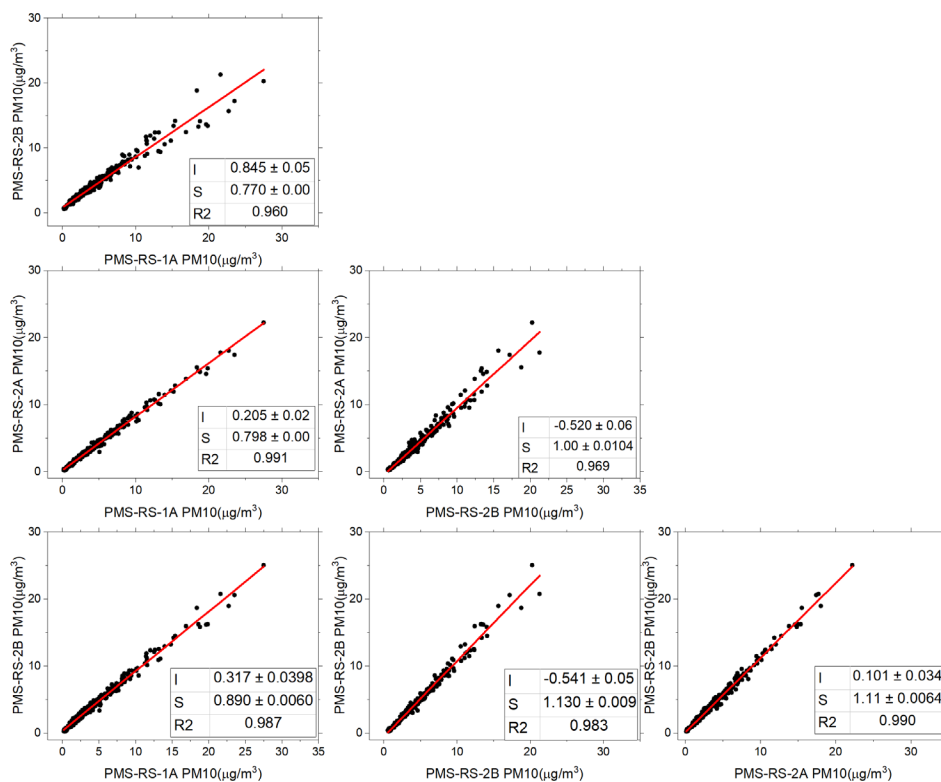

**Figure S4:** Inter-sensor correlation for the PMS5003 sensors at the RS site. The plot includes measurements recorded between 04/18/2022 – 04/30/2022. I: intercept; S: slope. Each measurement represents hourly averaged concentrations.

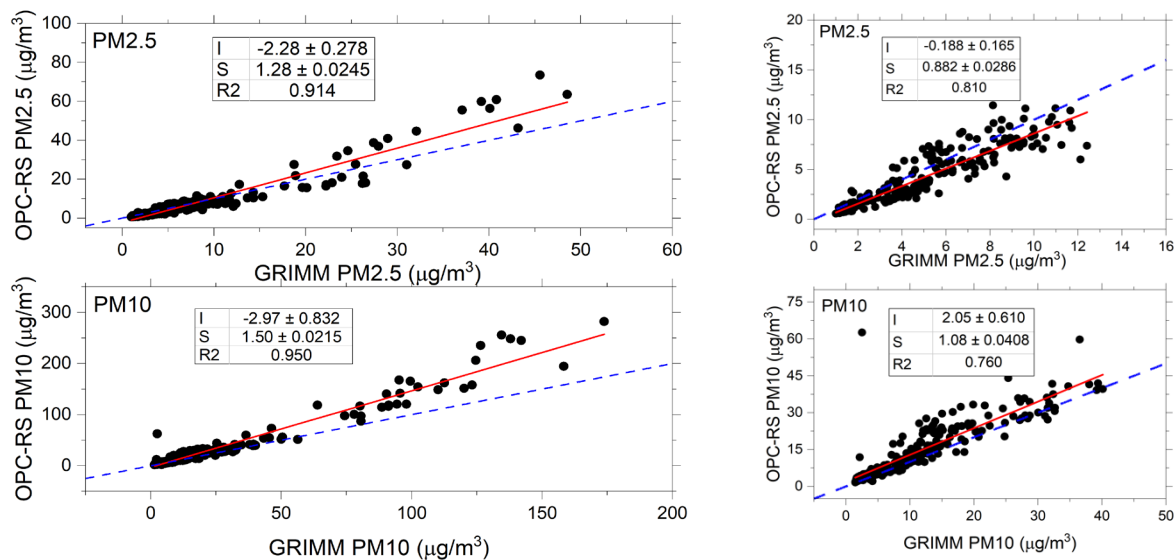

**Figure S5:** PM<sub>2.5</sub> and PM<sub>10</sub> comparison for OPC-RS and GRIMM at RS site (left) using all the measurements between 04/18/2022 – 04/30/2022; (right) removing high concentrations values (PM<sub>10</sub> > 50 µg/m³) to focus on typical ambient measurements. I: intercept; S: slope. Each measurement represents hourly averaged concentrations.

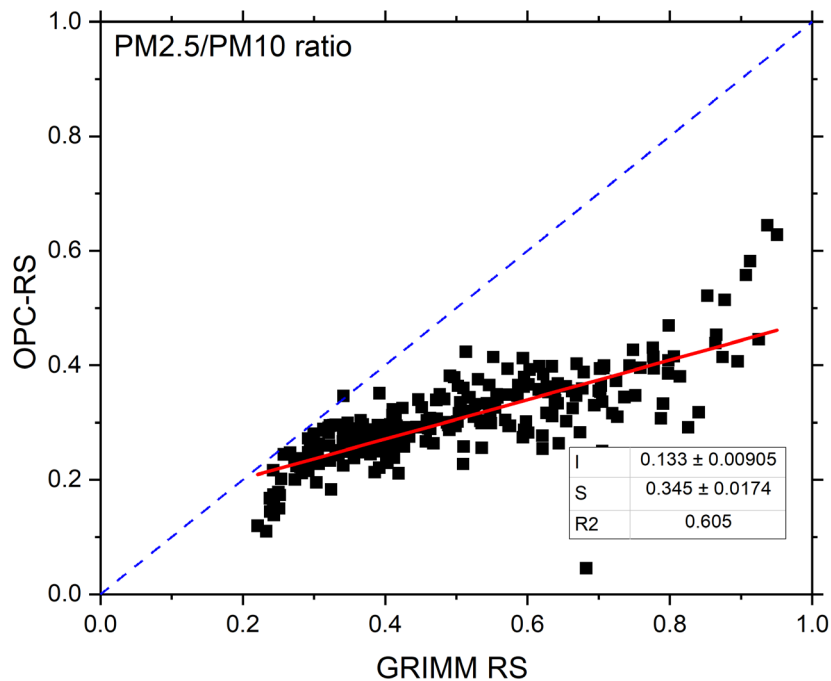

**Figure S6:** PM<sub>2.5</sub>/PM<sub>10</sub> ratio for OPC-RS vs. the PM<sub>2.5</sub>/PM<sub>10</sub> ratio GRIMM-RS. The plot includes measurements recorded between 04/18/2022 – 04/30/2022. Each measurement represents hourly averaged concentrations.

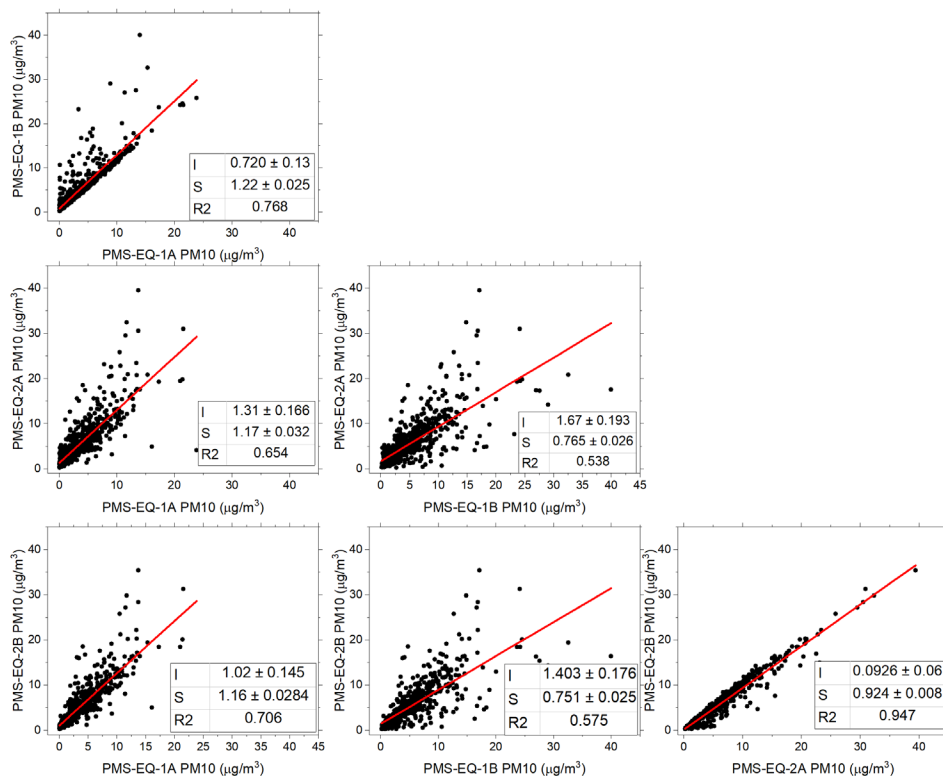

**Figure S7:** Inter-sensor correlation for the PMS5003 sensors at EQ. The plot includes measurements recorded between 04/1/2022 – 04/30/2022. Each measurement represents hourly averaged PM<sub>10</sub> concentrations.

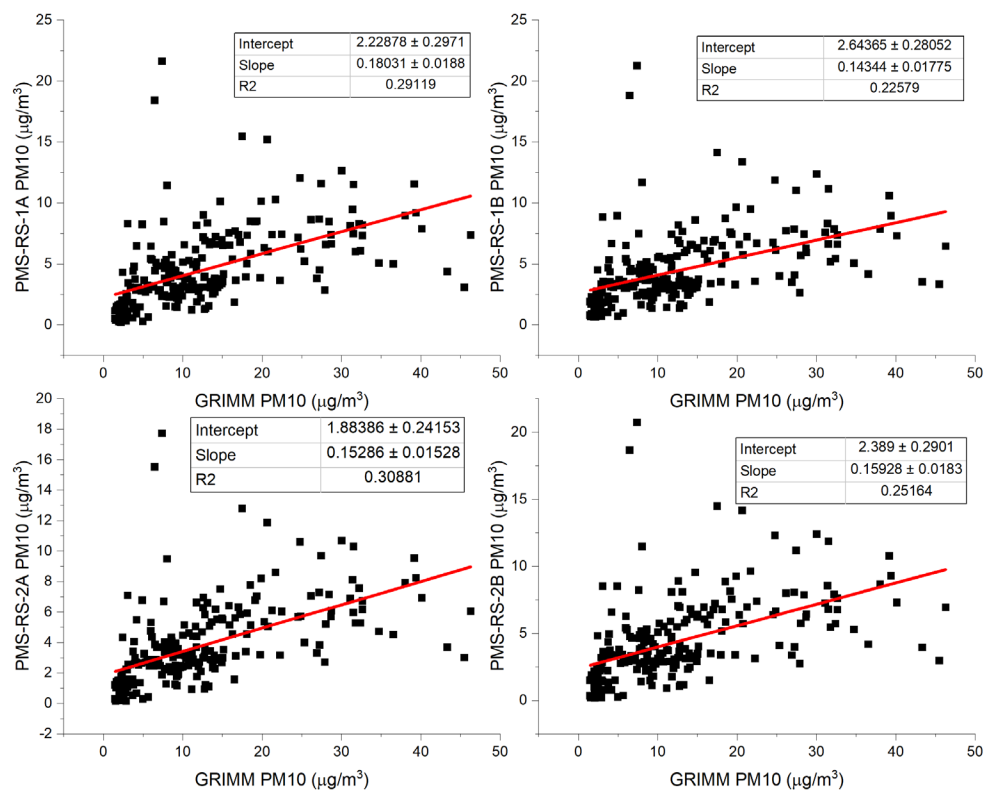

**Figure S8:** PM<sub>10</sub> concentrations for PM<sub>10</sub> < 50  $\mu\text{g}/\text{m}^3$ : Uncorrected PMS sensors vs. GRIMM at RS site. Each measurement represents hourly averaged concentrations.

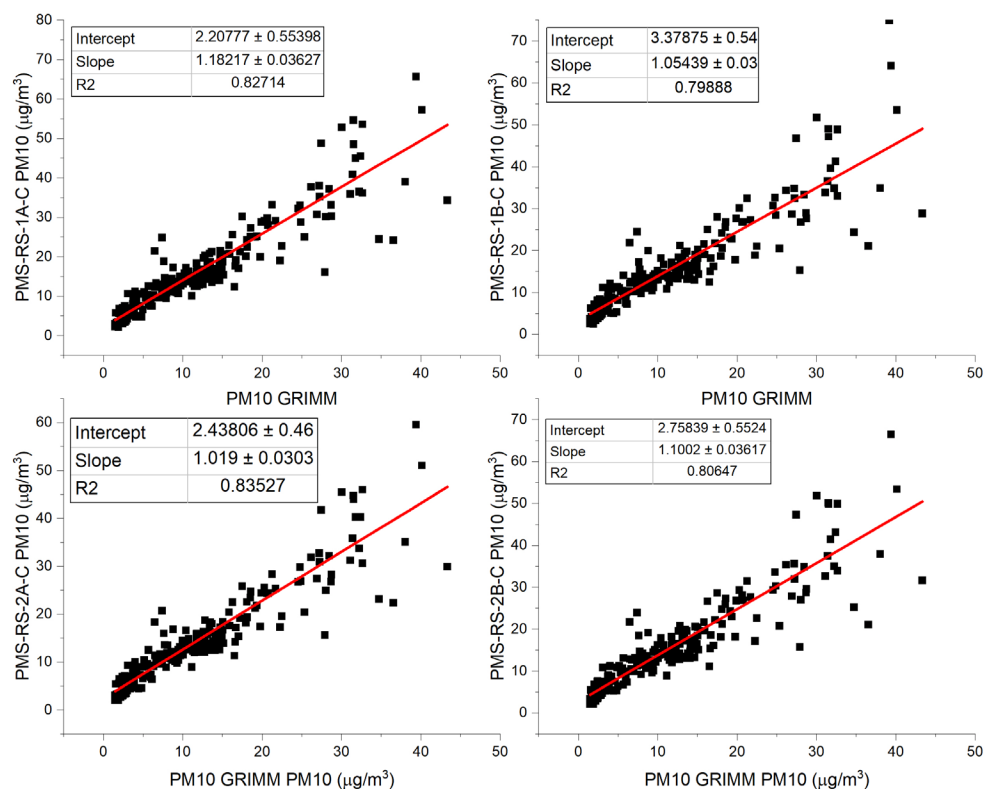

**Figure S9:** PM<sub>10</sub> concentrations for PM<sub>10</sub> < 50 µg/m<sup>3</sup> at RS. Corrected PMS sensors using GRIMM PM ratio vs GRIMM at RS site. Each measurement represents hourly averaged concentrations.

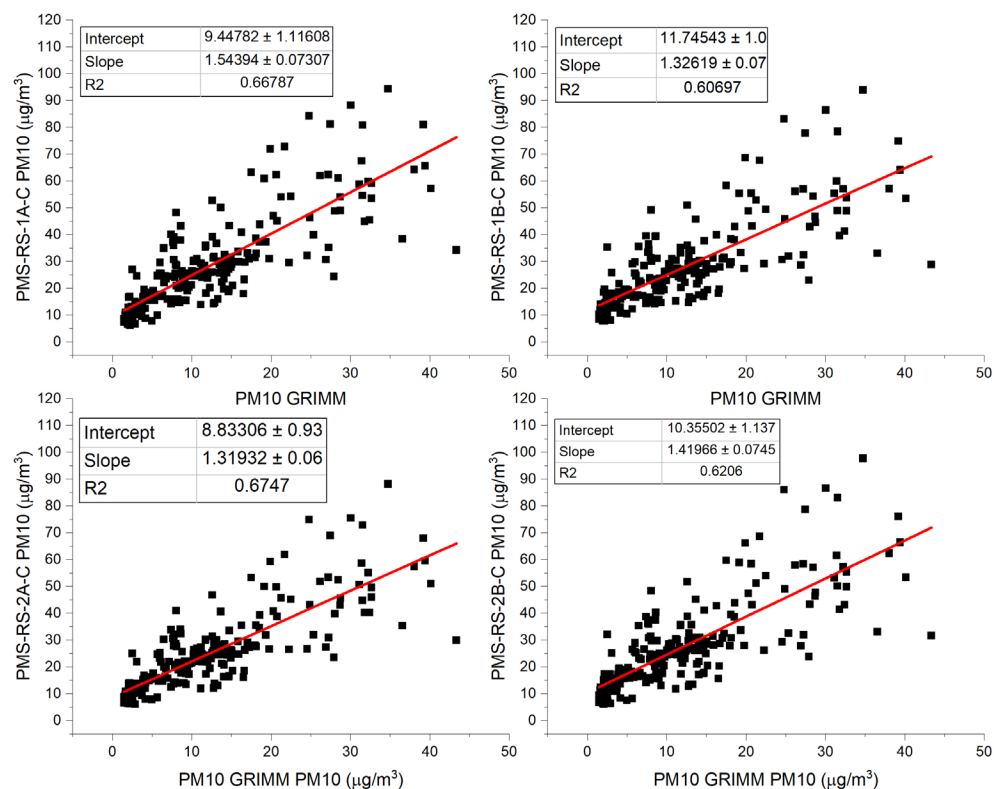

**Figure S10:** PM<sub>10</sub> concentrations for PM<sub>10</sub> < 50 µg/m<sup>3</sup>: Corrected PMS sensors using OPC-RS PM ratio vs. GRIMM at RS site. Each measurement represents hourly averaged concentrations.

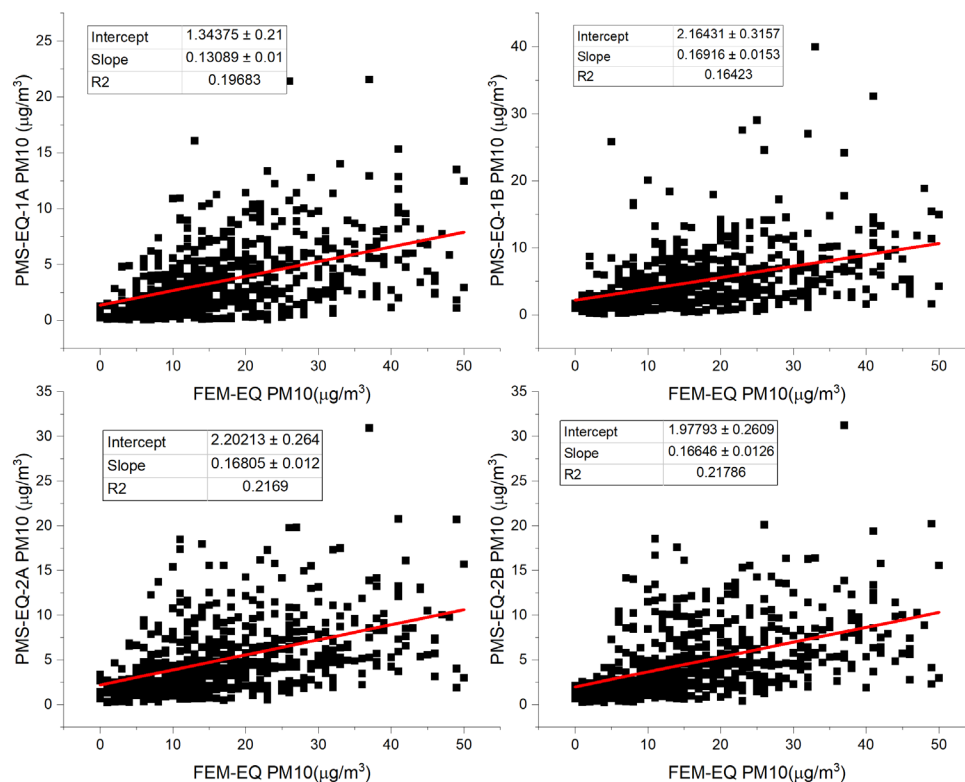

**Figure S11:** PM<sub>10</sub> concentrations for PM<sub>10</sub> < 50 µg/m<sup>3</sup>: Uncorrected PMS sensors vs FEM-EQ PM<sub>10</sub>. Each measurement represents hourly averaged concentrations.

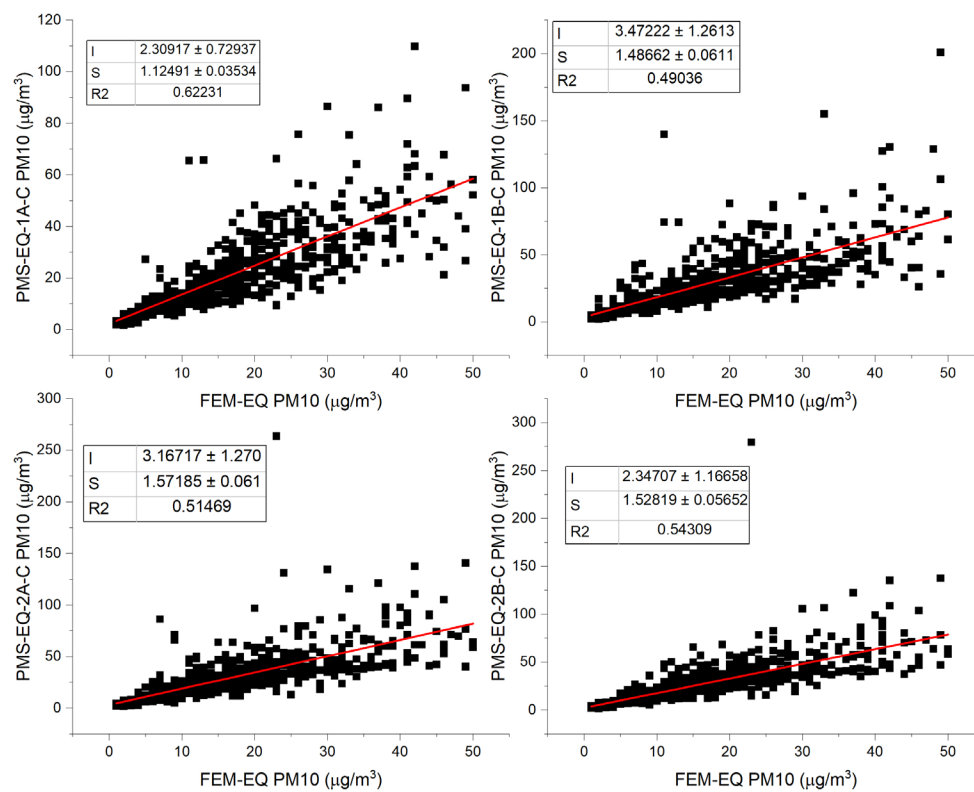

**Figure S12:** PM<sub>10</sub> concentrations for PM<sub>10</sub> < 50 μg/m<sup>3</sup>: Corrected PMS sensors vs FEM-EQ PM<sub>10</sub>. Each measurement represents hourly averaged concentrations.

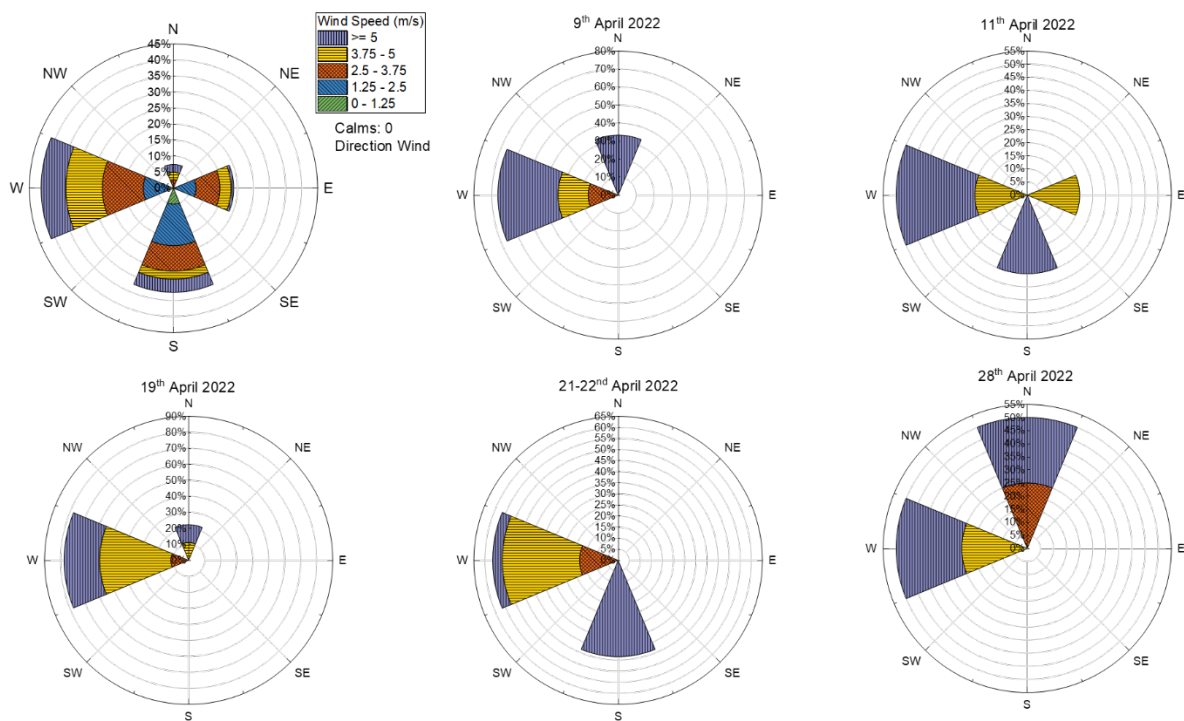

**Figure S13:** Wind roses at EQ monitoring station for April 2022 and individual dust events.

**Table S1:** Meteorological and PM characteristics during the dust events at the EQ monitoring site. The number in the parenthesis represents the minimum and maximum of the parameter.

| Start             | Duration<br>(hrs) | Wind<br>Speed<br>(m/s) | Relative<br>humidity<br>% | Temperature<br>(°C) | PM <sub>2.5</sub> /PM <sub>10</sub> | PM <sub>10</sub><br>(µg/m <sup>3</sup> ) |
|-------------------|-------------------|------------------------|---------------------------|---------------------|-------------------------------------|------------------------------------------|
| All non-dust days | 658               | 3.17 [0.57, 8.84]      | 40.4 [10, 99]             | 9.58 [-2.78, 23.3]  | 0.38 [0.026, 1]                     | 18.72 [0.9, 249 #]                       |
| 4/9/22 5:00 AM    | 6                 | 4.97 [3.23, 6.27]      | 40 [24, 47]               | 10.2 [7.8, 16.1]    | 0.12 [0.083, 0.187]                 | 83.3 [40, 133]                           |
| 4/11/22 9:00 AM   | 10                | 5.96 [3.75, 8.79]      | 23.5 [13, 43]             | 11.3 [6.1, 15]      | 0.1 [0.04, 0.173]                   | 119.3 [49, 302]                          |

|                 |    |                      |                  |                     |                       |                    |
|-----------------|----|----------------------|------------------|---------------------|-----------------------|--------------------|
| 4/19/22 9:00 AM | 9  | 5.51<br>[2.57,9.1]   | 25.4<br>[18,33]  | 16.2<br>[13.9,17.8] | 0.24<br>[0.105,0.42]  | 101.33<br>[50,152] |
| 4/21/22 9:00 AM | 23 | 5.82<br>[2.88,9.67]  | 35.22<br>[11,69] | 15.9<br>[7.2,23.9]  | 0.14<br>[0.059,0.25]  | 163.1<br>[45,327]  |
| 4/28/22 9:00 PM | 4  | 5.96<br>[2.93, 9.61] | 41.3<br>[32,49]  | 14<br>[11.1,17.2]   | 0.15<br>[0.046,0.254] | 138.75<br>[37,239] |

# two measurements with high  $PM_{10}$  concentration (249 and 124  $\mu\text{g}/\text{m}^3$ ) were observed at 4/4/2022 11:00pm and 4/5/2022 12:00 am. The measurements did not meet the dust-event criteria and hence was not included in the dust events.

**Section S2:** Correcting OPC-N3 data at HW using the correlation between the OPC-N3 and the FEM-HW  
Using the linear correlation obtained from the OPC-HW vs. FEM-HW (Figure S14 left), the OPC-N3 data was corrected to check for any improvement in the RMSE. The RMSE increased slightly to 12.9 from 12.4  $\mu\text{g}/\text{m}^3$  after correction. The slope improved from 0.92 to 0.99, but the  $R^2$  remained constant.

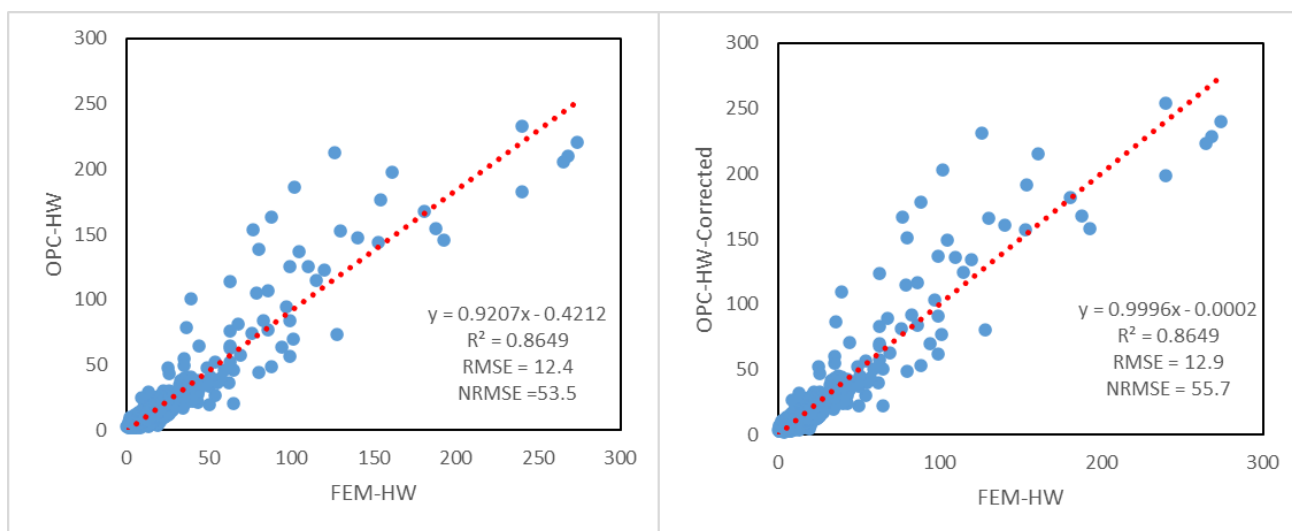

**Figure S14:** OPC-N3 vs BAM at HW: (left) OPC-HW vs FEM-HW; (right) Corrected OPC-HW vs FEM-HW. . Each measurement represents hourly averaged concentrations.

### Section S3: Housing for the OPC-N3

A custom housing was built for OPC-N3 to protect the sensor from rain (Fig.S15). The housing includes: 1) opening for sensor inlet; 2) a small hood to protect from rain; 3) opening for air circulation; 4) opening for the wiring. The sensor bottom has drainage port (not visible in the Fig. S15), in case water entered from the opening at the back of the housing.

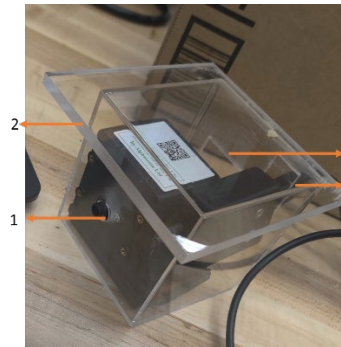

**Figure S15:** Housing for the OPC-N3. The number 1, 2, 3, and 4 represent opening for the inlet, hood for the sensor, opening for air circulation, and opening for the wiring, respectively.

### References:

- Crilley, L. R., Shaw, M., Pound, R., Kramer, L. J., Price, R., Young, S., Lewis, A. C., & Pope, F. D. (2018). Evaluation of a low-cost optical particle counter (Alphasense OPC-N2) for ambient air monitoring. *Atmospheric Measurement Techniques*, 11(2), 709–720. <https://doi.org/10.5194/amt-11-709-2018>
